# Supplementary material
Source: PubMed Central journal article supplement (PMC8595553)
Supplement: NIHMS1723323-supplement-supinfo.pdf [file NIHMS1723323-supplement-supinfo.pdf]

## **SUPPLEMENTAL MATERIAL**

### **Table of Contents**

|                                |                                                                             |
|--------------------------------|-----------------------------------------------------------------------------|
| <b>Supplementary Methods.</b>  | Search Strategy                                                             |
| <b>Supplementary Table 1</b>   | Description of Included Randomized Controlled Trials                        |
| <b>Supplementary Table 2.</b>  | Intervention Moderators                                                     |
| <b>Supplementary Table 3.</b>  | Risk of Bias Moderators                                                     |
| <b>Supplementary Table 4.</b>  | Risk of Bias Assessments                                                    |
| <b>Supplementary Table 5.</b>  | Pharmacist Patient Care Services Intervention Reporting (PaCIR) Assessments |
| <b>Supplementary Figure 1.</b> | Forest Plot of Blood Pressure Outcomes                                      |
| <b>Supplementary Figure 2.</b> | Forest Plot of Mortality Outcomes                                           |
| <b>Supplementary Figure 3.</b> | Forest Plot of Hospitalization/Readmission Outcomes                         |
| <b>Supplementary Figure 4.</b> | Funnel Plot                                                                 |

## Supplementary Methods. Search Strategy

Searches were run using both controlled vocabulary (i.e., MeSH terms) and keywords in the title or abstract fields. The following databases were searched: PubMed, Scopus, CINAHL, Cochrane Central Register of Controlled Trials, Cochrane Database of Systematic Reviews, and Google Scholar. Databases were searched from inception through April 2, 2020. No limitations were put on the search in terms of language, date of publication, or geography.

PubMed: 3025 + 8 = 3033 (0 additional duplicates removed)

(((((("Medication adherence"[Mesh] OR "Medication adherence" [Title/Abstract]))  
OR (((("Pharmaceutical Preparations"[Mesh] OR drugs[Title/Abstract] OR medication\*[Title/Abstract] OR  
prescription\*[Title/abstract] or pharmaceutical\*[title/abstract])))  
AND ("Patient Compliance"[Mesh] OR "Treatment Refusal"[Mesh] OR adherence  
[Title/Abstract] OR non-adherence [Title/Abstract] OR nonadherence [Title/Abstract] OR  
adherent [Title/Abstract] OR non-adherent [Title/Abstract] OR nonadherent [Title/Abstract] OR  
compliance [Title/Abstract] OR non-compliance [Title/Abstract] OR noncompliance  
[Title/Abstract] OR compliant [Title/Abstract] OR non-compliant [Title/Abstract] OR  
noncompliant [Title/Abstract] OR concordance [Title/Abstract] OR "Patient Compliance"  
[Title/Abstract] OR "Treatment acceptance" [Title/Abstract] OR "Treatment  
Refusal"[Title/Abstract])))

AND (intervention\*[title/abstract] OR "Medication Reconciliation"[Mesh] OR "Medication  
Reconciliation"[Title/Abstract] OR "Medication Therapy Management"[Mesh] OR "medication therapy  
management"[Title/Abstract] OR "medication management"[Title/Abstract] OR "Voluntary Programs"[Mesh] OR  
"Health Education"[Mesh] OR care[title/abstract] OR coach\*[Title/Abstract] OR consult\*[title/abstract] OR  
counsel\*[Title/Abstract] OR educat\*[Title/Abstract] OR feedback[Title/Abstract] OR help\*[title/abstract] OR  
inform\*[Title/Abstract] OR intervention\*[title/abstract] OR program\*[Title/Abstract] OR review[Title/Abstract] OR  
support\*[title/abstract] OR teach\*[Title/Abstract]))

AND ("Pharmacists"[Mesh] OR Pharmacist\* OR "Pharmacies"[Mesh] OR pharmacy OR pharmacies OR  
"Pharmaceutical Services"[Mesh] OR "pharmaceutical care"[title/abstract] OR "pharmaceutical  
services"[Title/Abstract] OR "Community Pharmacy Services"[Mesh] OR "community pharmacy  
services"[Title/Abstract]))

AND (((("Aged"[MeSH] OR "Aged, 80 AND OVER"[MeSH] OR geriatric[Title/Abstract] OR  
elderly[Title/Abstract] OR "older adults"[Title/Abstract] OR senior\*[Title/Abstract])) NOT ("nursing  
home"[Title/Abstract] OR "nursing homes"[Title/Abstract] OR "long-term care"[Title/Abstract]))

Scopus: 361 + 2 = 364 (one duplicate removed)

( TITLE-ABS ( ( {Medication adherence} ) OR ( ( drugs OR medication\* OR prescription\* OR  
pharmaceutical\* ) AND ( adherence OR non-adherence OR nonadherence OR adherent OR non-adherent OR  
nonadherent OR compliance OR non-compliance OR noncompliance OR compliant OR non-compliant OR  
noncompliant OR concordance OR {Patient Compliance} OR {Treatment acceptance} OR {Treatment  
Refusal} ) ) )

AND (Title-Abs( intervention\* OR {medication therapy management} OR {medication management} OR care  
OR coach\* OR consult\* OR counsel\* OR educat\* OR feedback OR help\* OR inform\* OR intervention\*  
OR program\* OR review OR support\* OR teach\* ) )

AND (Title-Abs( pharmacist\* OR pharmacy OR pharmacies OR {pharmaceutical care} OR {pharmaceutical  
services} ) )

AND ( TITLE-ABS ( ( geriatric OR elderly OR {older adults} OR senior\* ) ) AND NOT ( {nursing home}  
OR {nursing homes} OR {long-term care} ) ) )

CINAHL: 799 + 11 = 810 (9 duplicates removed)

Cochrane Central Register of Controlled Trials: 312 + 2 = 314 (1 duplicate removed)

Cochrane Database of Systematic Reviews: 0 + 0 = 0

PsycINFO: 65 + 0 = 65

(( MH "Medication Compliance")

OR ( ( MH "Drugs" OR TI ( drugs OR medication\* OR prescription\* OR pharmaceutical\* ) OR AB ( drugs OR medication\* OR prescription\* OR pharmaceutical\* ) )

AND ( MH "Patient Compliance" OR TI ( adherence OR non-adherence OR nonadherence OR adherent OR non-adherent OR nonadherent OR compliance OR non-compliance OR noncompliance OR compliant OR non-compliant OR noncompliant OR concordance OR "Patient Compliance" OR "Treatment acceptance" OR "Treatment Refusal" ) OR AB ( adherence OR non-adherence OR nonadherence OR adherent OR non-adherent OR nonadherent OR compliance OR non-compliance OR noncompliance OR compliant OR non-compliant OR noncompliant OR concordance OR "Patient Compliance" OR "Treatment acceptance" OR "Treatment Refusal" ) ) ) )

AND ( MH "Pharmacists" OR TI ( Pharmacist\* OR pharmacy OR pharmacies OR "pharmaceutical care" OR "pharmaceutical services" ) OR AB ( Pharmacist\* OR pharmacy OR pharmacies OR "pharmaceutical care" OR "pharmaceutical services" ) )

AND ( TI ( intervention\* OR "medication therapy management" OR "medication management" OR care OR coach\* OR consult\* OR counsel\* OR educat\* OR feedback OR help\* OR inform\* OR intervention\* OR program\* OR review OR support\* OR teach\* ) OR AB ( intervention\* OR "medication therapy management" OR "medication management" OR care OR coach\* OR consult\* OR counsel\* OR educat\* OR feedback OR help\* OR inform\* OR intervention\* OR program\* OR review OR support\* OR teach\* ) )

AND ( ( MH "Aged" OR MH "Aged, 80 and Over" OR MH "Frail Elderly" ) OR TI ( geriatric OR elderly OR "older adults" OR senior\* ) OR AB ( geriatric OR elderly OR "older adults" OR senior\* ) )

NOT ( TI ("nursing home" OR "nursing homes" OR "long-term care") OR AB ("nursing home" OR "nursing homes" OR "long-term care") )

Google Scholar: top 100, sorted by relevance, eliminated citations and patents, plus top 25 sorted by date = 125 (5 duplicates removed)

(medication OR prescription)

AND (adherence OR compliance)

AND pharmacist

AND (intervention OR program OR consult OR manage)

AND (elderly OR geriatric)

| <b>Supplementary Table 1. Description of Included Randomized Controlled Trials</b> |                                                   |                   |                                 |                                                                                                                                    |                                               |                                                                                                                                    |
|------------------------------------------------------------------------------------|---------------------------------------------------|-------------------|---------------------------------|------------------------------------------------------------------------------------------------------------------------------------|-----------------------------------------------|------------------------------------------------------------------------------------------------------------------------------------|
| <b>Author (Year)<br/>Country/Region</b>                                            | <b>Sample size (by treatment arm)<sup>a</sup></b> | <b>Female (%)</b> | <b>Sample age, mean (years)</b> | <b>Brief description of intervention</b>                                                                                           | <b>Intervention length (days)<sup>b</sup></b> | <b>Adherence outcome measure(s) coded</b>                                                                                          |
| <b>Al-Rashed (2002)</b><br>England                                                 | I: 45<br>C: 44                                    | 43.4              | 80.6                            | Medication counseling, a medication and information discharge summary, and a simple medication reminder card at hospital discharge | 1                                             | <ul style="list-style-type: none"> <li>• Pill count</li> </ul>                                                                     |
| <b>Begley (1997)</b><br>England                                                    | I: 74<br>C: 75                                    | 62.9              | -                               | Medication counseling during home visits                                                                                           | 365                                           | <ul style="list-style-type: none"> <li>• Self-report by face-to-face interview</li> </ul>                                          |
| <b>Bernsten (2001)</b><br>Europe                                                   | I: 1290<br>C: 1164                                | 57.6              | -                               | Pharmaceutical care                                                                                                                | 540                                           | <ul style="list-style-type: none"> <li>• Self-report by face-to-face interview</li> </ul>                                          |
| <b>Bonetti (2018)</b><br>Brazil                                                    | I: 66<br>C: 67                                    | 33.7              | 65                              | Medication counseling at hospital discharge                                                                                        | -                                             | <ul style="list-style-type: none"> <li>• Self-report by face-to-face interview</li> </ul>                                          |
| <b>Bouvy (2003)</b><br>Netherlands                                                 | I: 74<br>C: 78                                    | 34.2              | 69.7                            | Medication consultation                                                                                                            | 180                                           | <ul style="list-style-type: none"> <li>• Electronic event monitoring device</li> </ul>                                             |
| <b>Clifford (2006)</b><br>England                                                  | I: 261<br>C: 239                                  | 52.2              | 67                              | Patient-centered advice about a new medication                                                                                     | 14                                            | <ul style="list-style-type: none"> <li>• Self-report by telephone interview</li> </ul>                                             |
| <b>Cooney (2015)</b><br>USA                                                        | I: 1070<br>C: 1129                                | 1.8               | 76.7                            | Multi-pronged quality improvement program                                                                                          | -                                             | <ul style="list-style-type: none"> <li>• Self-report by telephone interview</li> </ul>                                             |
| <b>Eyler (2016)</b><br>USA                                                         | I: 16<br>C: 14                                    | 56.7              | 78.8                            | Motivational interviewing                                                                                                          | 1                                             | <ul style="list-style-type: none"> <li>• Self-report by telephone interview</li> <li>• Filling prescription at pharmacy</li> </ul> |
| <b>Goodyer (1995)</b><br>England                                                   | I: 50<br>C: 50                                    | 73                | 84.5                            | Medication counseling                                                                                                              | 90                                            | <ul style="list-style-type: none"> <li>• Pill count</li> </ul>                                                                     |
| <b>Gwadry-Sridhar (2005)</b><br>England                                            | I: 68<br>C: 68                                    | 28.4              | 66                              | In-hospital education                                                                                                              | 1                                             | <ul style="list-style-type: none"> <li>• Pharmacy refills</li> </ul>                                                               |
| <b>Hanlon (1996)</b><br>USA                                                        | I: 105<br>C: 103                                  | 1.0               | 69.8                            | Pharmaceutical care                                                                                                                | -                                             | <ul style="list-style-type: none"> <li>• Self-report by face-to-face interview</li> </ul>                                          |
| <b>Hunt (2008)</b><br>USA                                                          | I: 230<br>C: 233                                  | 18                | 68                              | Physician-pharmacist collaborative care                                                                                            | 365                                           | <ul style="list-style-type: none"> <li>• Self-report, method of data collection unclear</li> </ul>                                 |
| <b>Jung (2017)</b><br>Korea                                                        | I: 105<br>C: 105                                  | 43.8              | 66.3                            | Administration timing simplification protocol                                                                                      | 90                                            | <ul style="list-style-type: none"> <li>• Pill count</li> <li>• Self-report, method of data collection unclear</li> </ul>           |

| <b>Author (Year)<br/>Country/Region</b> | <b>Sample size (by treatment arm)<sup>a</sup></b> | <b>Female (%)</b> | <b>Sample age, mean (years)</b> | <b>Brief description of intervention</b>                                                    | <b>Intervention length (days)<sup>b</sup></b> | <b>Adherence outcome measure(s) coded</b>                                                                                                                                                                         |
|-----------------------------------------|---------------------------------------------------|-------------------|---------------------------------|---------------------------------------------------------------------------------------------|-----------------------------------------------|-------------------------------------------------------------------------------------------------------------------------------------------------------------------------------------------------------------------|
| <b>Khmour (2009)</b><br>Ireland         | I: 86<br>C: 87                                    | 56.1              | 66.5                            | Pharmaceutical care                                                                         | 365                                           | <ul style="list-style-type: none"> <li>• Self-report by written questionnaire</li> </ul>                                                                                                                          |
| <b>Lai (2011)</b><br>Malaysia           | I: 100<br>C: 98                                   | 100               | 66.1                            | Pharmaceutical care                                                                         | 365                                           | <ul style="list-style-type: none"> <li>• Pharmacy refills</li> <li>• Pill count</li> <li>• Medication administration diary data recorded by participants</li> <li>• Self-report face-to-face interview</li> </ul> |
| <b>Lam (2017)</b><br>USA                | I: 68<br>C: 66                                    | 52.2              | 70                              | Medication counseling via Talking Pill Bottles                                              | 90                                            | <ul style="list-style-type: none"> <li>• Self-report face-to-face interview</li> </ul>                                                                                                                            |
| <b>Lee (2006)</b><br>USA                | I: 83<br>C: 76                                    | 25.8              | 78                              | Pharmaceutical care                                                                         | 180                                           | <ul style="list-style-type: none"> <li>• Pill count</li> </ul>                                                                                                                                                    |
| <b>Lim (2004)</b><br>Singapore          | I: 68<br>C: 68                                    | 65.1              | 80                              | Pharmaceutical care                                                                         | 60                                            | <ul style="list-style-type: none"> <li>• Self-report face-to-face interview</li> </ul>                                                                                                                            |
| <b>Lipton (1994)</b><br>USA             | I: 350<br>C: 356                                  | -                 | 74.5                            | Pharmaceutical care                                                                         | 90                                            | <ul style="list-style-type: none"> <li>• Self-report by telephone interview</li> </ul>                                                                                                                            |
| <b>López Cabezas (2006)</b> Spain       | I: 70<br>C: 64                                    | 55.6              | 75.7                            | Pharmaceutical care                                                                         | 365                                           | <ul style="list-style-type: none"> <li>• Pill count</li> </ul>                                                                                                                                                    |
| <b>Lowe (1995)</b><br>England           | I: 45<br>C: 42                                    | 65.9              | 78.3                            | Inpatient self-medication program                                                           | -                                             | <ul style="list-style-type: none"> <li>• Pill count</li> </ul>                                                                                                                                                    |
| <b>Lowe (2000)</b><br>England           | I: 77<br>C: 84                                    | 67.1              | 76.2                            | Medication review and counseling                                                            | -                                             | <ul style="list-style-type: none"> <li>• Pill count</li> </ul>                                                                                                                                                    |
| <b>Lyons (2016)</b><br>England          | I: 340<br>C: 337                                  | 41.5              | 69.9                            | Medication counseling, a written summary of the discussion, and a medication reminder chart | 35                                            | <ul style="list-style-type: none"> <li>• Pharmacy refills</li> <li>• Self-report by written questionnaire</li> </ul>                                                                                              |
| <b>Messerli (2016)</b><br>Switzerland   | I: 218<br>C: 232                                  | 54                | 67.1                            | Pharmaceutical care                                                                         | 196                                           | <ul style="list-style-type: none"> <li>• Self-report by face-to-face interview</li> <li>• Self-report by telephone interview</li> </ul>                                                                           |

| <b>Author (Year)<br/>Country/Region</b> | <b>Sample size (by treatment arm)<sup>a</sup></b> | <b>Female (%)</b> | <b>Sample age, mean (years)</b> | <b>Brief description of intervention</b>                                                                                    | <b>Intervention length (days)<sup>b</sup></b> | <b>Adherence outcome measure(s) coded</b>                                                                                                                                       |
|-----------------------------------------|---------------------------------------------------|-------------------|---------------------------------|-----------------------------------------------------------------------------------------------------------------------------|-----------------------------------------------|---------------------------------------------------------------------------------------------------------------------------------------------------------------------------------|
| <b>Naunton (2003)</b><br>Australia      | I: 57<br>C: 64                                    | 62.8              | -                               | Pharmaceutical care                                                                                                         | 85                                            | <ul style="list-style-type: none"> <li>• Self-report face-to-face interview</li> </ul>                                                                                          |
| <b>Nazareth (2001)</b><br>England       | I: 165<br>C: 156                                  | 64                | 84                              | Medication discharge plan followed by home visit                                                                            | -                                             | <ul style="list-style-type: none"> <li>• Self-report face-to-face interview</li> </ul>                                                                                          |
| <b>Obreli-Neto (2011)</b><br>Brazil     | I: 100<br>C: 100                                  | 62.4              | 65.3                            | Pharmaceutical care                                                                                                         | 1098                                          | <ul style="list-style-type: none"> <li>• Pharmacy refills</li> <li>• Self-report face-to-face interview</li> </ul>                                                              |
| <b>Olesen (2014)</b><br>Denmark         | I: 315<br>C: 315                                  | 51.6              | -                               | Pharmaceutical care                                                                                                         | 275                                           | <ul style="list-style-type: none"> <li>• Pill count</li> </ul>                                                                                                                  |
| <b>Schulz (2019)</b><br>Germany         | I: 130<br>C: 128                                  | 38.4              | 74.1                            | Pharmaceutical care                                                                                                         | -                                             | <ul style="list-style-type: none"> <li>• Pharmacy refills</li> </ul>                                                                                                            |
| <b>Shim (2018)</b><br>Malaysia          | I: 80<br>C: 80                                    | 42.8              | -                               | Physician-pharmacist collaborative care                                                                                     | 180                                           | <ul style="list-style-type: none"> <li>• Self-report face-to-face interview</li> </ul>                                                                                          |
| <b>Solomon (1998)</b><br>USA            | I: 63<br>C: 70                                    | 4.5               | 66.8                            | Pharmaceutical care                                                                                                         | 180                                           | <ul style="list-style-type: none"> <li>• Self-report face-to-face interview</li> </ul>                                                                                          |
| <b>Stewart (2014)</b><br>Australia      | I: 207<br>C: 188                                  | 48.9              | 66.7                            | Multi-pronged, including medication review, motivational interviewing, refill reminders, and blood pressure self-monitoring | 180                                           | <ul style="list-style-type: none"> <li>• Self-report by written questionnaire</li> </ul>                                                                                        |
| <b>Sturgess (2003)</b><br>Ireland       | I: 110<br>C: 81                                   | 62.3              | 73.6                            | Pharmaceutical care                                                                                                         | 540                                           | <ul style="list-style-type: none"> <li>• Pharmacy refills</li> <li>• Self-report by face-to-face interview</li> <li>• Self-report, method of data collection unclear</li> </ul> |
| <b>Tommelein (2014)</b><br>Belgium      | I: 371<br>C: 363                                  | -                 | 68.6                            | Pharmaceutical care                                                                                                         | 90                                            | <ul style="list-style-type: none"> <li>• Pharmacy refills</li> </ul>                                                                                                            |
| <b>Varma (1999)</b><br>Ireland          | I: 42<br>C: 41                                    | 59                | 75.9                            | Pharmaceutical care                                                                                                         | -                                             | <ul style="list-style-type: none"> <li>• Pharmacy refills</li> </ul>                                                                                                            |
| <b>Vivian (2002)</b><br>USA             | I: 27<br>C: 29                                    | 0                 | 65                              | Pharmaceutical care                                                                                                         | 180                                           | <ul style="list-style-type: none"> <li>• Pharmacy refills</li> <li>• Self-report by written questionnaire</li> </ul>                                                            |

| <b>Author (Year)<br/>Country/Region</b>   | <b>Sample size (by treatment arm)<sup>a</sup></b> | <b>Female (%)</b> | <b>Sample age, mean (years)</b> | <b>Brief description of intervention</b> | <b>Intervention length (days)<sup>b</sup></b> | <b>Adherence outcome measure(s) coded</b>                                                         |
|-------------------------------------------|---------------------------------------------------|-------------------|---------------------------------|------------------------------------------|-----------------------------------------------|---------------------------------------------------------------------------------------------------|
| <b>Willeboordse (2017)</b><br>Netherlands | I: 275<br>C: 243                                  | 64.9              | 77.7                            | Pharmaceutical care                      | 1                                             | <ul style="list-style-type: none"> <li>• Self-report by written questionnaire</li> </ul>          |
| <b>Willoch (2012)</b><br>Norway           | I: 40<br>C: 37                                    | 62.3              | 75.1                            | Pharmaceutical care                      | -                                             | <ul style="list-style-type: none"> <li>• Self-report by face-to-face interview</li> </ul>         |
| <b>Wu (2006)</b><br>China                 | I: 219<br>C: 223                                  | 51.4              | 70.8                            | Medication counseling                    | 730                                           | <ul style="list-style-type: none"> <li>• Combination of measures including self-report</li> </ul> |

**Abbreviations:** C: control; I: intervention; USA: United States of America

<sup>a</sup>Sample size reported for baseline

<sup>b</sup>Number of days over which the intervention sessions were given which will potentially have an effect on medication adherence

**Supplementary Table 2. Intervention Moderators**

| Moderator                                                | k  | d    | 95% CI     | I <sup>2</sup> , % | Q     | p    |
|----------------------------------------------------------|----|------|------------|--------------------|-------|------|
| Medication education                                     |    |      |            |                    |       |      |
| Yes                                                      | 26 | 0.50 | 0.33-0.67  | 84.41              | 5.82  | .016 |
| No                                                       | 12 | 0.19 | 0.01-0.38  | 65.00              |       |      |
| Disease education                                        |    |      |            |                    |       |      |
| Yes                                                      | 11 | 0.15 | 0.00-0.29  | 52.04              | 9.20  | .002 |
| No                                                       | 27 | 0.50 | 0.32-0.68  | 83.12              |       |      |
| Medication counseling                                    |    |      |            |                    |       |      |
| Yes                                                      | 18 | 0.46 | 0.26-0.67  | 81.04              | 0.55  | .460 |
| No                                                       | 20 | 0.36 | 0.18-0.54  | 81.69              |       |      |
| Medication calendars                                     |    |      |            |                    |       |      |
| Yes                                                      | 6  | 0.36 | 0.05-0.67  | 86.06              | 0.09  | .759 |
| No                                                       | 32 | 0.42 | 0.27-0.57  | 79.82              |       |      |
| Patient self-monitoring of medication-taking             |    |      |            |                    |       |      |
| Yes                                                      | 5  | 0.31 | 0.18-0.43  | 0.00               | 1.04  | .308 |
| No                                                       | 33 | 0.41 | 0.26-0.56  | 83.65              |       |      |
| Pharmacist review of medication regimen                  |    |      |            |                    |       |      |
| Yes                                                      | 22 | 0.38 | 0.20-0.57  | 84.74              | 0.14  | .711 |
| No                                                       | 16 | 0.44 | 0.24-0.63  | 73.65              |       |      |
| Packaging interventions (e.g., pillboxes, blister packs) |    |      |            |                    |       |      |
| Yes                                                      | 7  | 0.40 | 0.09-0.72  | 81.91              | 0.00  | .996 |
| No                                                       | 31 | 0.41 | 0.26-0.55  | 81.73              |       |      |
| Dose modification by provider                            |    |      |            |                    |       |      |
| Yes                                                      | 10 | 0.39 | 0.13-0.66  | 86.70              | 0.01  | .910 |
| No                                                       | 28 | 0.41 | 0.26-0.57  | 77.77              |       |      |
| Medication change to improve adherence                   |    |      |            |                    |       |      |
| Yes                                                      | 8  | 0.26 | -0.07-0.59 | 77.65              | 0.96  | .326 |
| No                                                       | 30 | 0.44 | 0.29-0.59  | 82.67              |       |      |
| Medication reduction to improve adherence                |    |      |            |                    |       |      |
| Yes                                                      | 10 | 0.45 | 0.16-0.75  | 86.23              | 0.13  | .724 |
| No                                                       | 28 | 0.39 | 0.24-0.54  | 79.00              |       |      |
| Intervention delivery setting                            |    |      |            |                    |       |      |
| Clinic                                                   | 8  | 0.20 | -0.13-0.52 | 81.68              | 10.90 | .012 |
| Home                                                     | 7  | 0.48 | 0.24-0.72  | 76.35              |       |      |
| Pharmacy                                                 | 7  | 0.13 | -0.03-0.29 | 67.71              |       |      |
| Multiple                                                 | 12 | 0.64 | 0.31-0.98  | 82.64              |       |      |
| Participants in hospital at start of intervention        |    |      |            |                    |       |      |
| Yes                                                      | 11 | 0.66 | 0.35-0.96  | 71.50              | 3.80  | .051 |
| No                                                       | 27 | 0.32 | 0.18-0.46  | 81.29              |       |      |



| <b>Moderator</b>                                                  | <b>k</b> | <b>d</b> | <b>95% CI</b> | <b>I<sup>2</sup>, %</b> | <b>Q</b> | <b>p</b> |
|-------------------------------------------------------------------|----------|----------|---------------|-------------------------|----------|----------|
| Intervention delivered in participants regular community pharmacy |          |          |               |                         |          |          |
| Part/All of intervention                                          | 9        | 0.20     | 0.02-0.38     | 77.16                   | 5.19     | .023     |
| None of intervention                                              | 28       | 0.49     | 0.32-0.67     | 80.45                   |          |          |

k = number of comparisons

d = standardized mean difference effect size

I<sup>2</sup> = index of heterogeneity beyond within-study sampling error

Q = heterogeneity statistic (weighted squared deviations from summary effect)

**Supplementary Table 3. Risk of Bias Moderators**

| Moderator                                                     | k  | d    | 95% CI     | I <sup>2</sup> , % | Q    | p    |
|---------------------------------------------------------------|----|------|------------|--------------------|------|------|
| Comparison group type                                         |    |      |            |                    |      |      |
| True control                                                  | 14 | 0.33 | 0.12-0.55  | 77.65              | 0.68 | .409 |
| Attention-control                                             | 24 | 0.45 | 0.28-0.62  | 83.52              |      |      |
| Randomization type                                            |    |      |            |                    |      |      |
| Individual                                                    | 19 | 0.51 | 0.29-0.72  | 79.98              | 2.30 | .130 |
| Site/cluster                                                  | 19 | 0.30 | 0.14-0.46  | 78.71              |      |      |
| Allocation concealed from staff responsible for randomization |    |      |            |                    |      |      |
| Not concealed                                                 | 1  | 0.22 | -0.25-0.70 | 0.00               | 1.27 | .529 |
| Not reported                                                  | 23 | 0.47 | 0.25-0.69  | 86.62              |      |      |
| Allocation concealed                                          | 14 | 0.35 | 0.22-0.48  | 56.92              |      |      |
| Data collectors blinded to treatment assignment               |    |      |            |                    |      |      |
| Not blinded                                                   | 9  | 0.43 | 0.13-0.73  | 84.73              | 0.05 | .977 |
| Blinded                                                       | 11 | 0.39 | 0.11-0.66  | 85.74              |      |      |
| Not clearly reported                                          | 18 | 0.40 | 0.22-0.59  | 77.04              |      |      |
| Intention-to-treat analysis used                              |    |      |            |                    |      |      |
| No/unclear                                                    | 25 | 0.53 | 0.31-0.74  | 84.95              | 6.35 | .012 |
| Yes                                                           | 13 | 0.20 | 0.07-0.34  | 65.13              |      |      |

k = number of comparisons

d = standardized mean difference effect size

I<sup>2</sup> = index of heterogeneity beyond within-study sampling error

Q = heterogeneity statistic (weighted squared deviations from summary effect)

**Supplementary Table 4. Risk of Bias Assessments**

|                            | Random sequence generation                                                          | Allocation concealment                                                              | Blinding of participants and personnel                                              | Blinding of outcome assessment                                                       | Incomplete outcome data                                                               | Selective outcome reporting                                                           | Other sources of bias                                                                 |
|----------------------------|-------------------------------------------------------------------------------------|-------------------------------------------------------------------------------------|-------------------------------------------------------------------------------------|--------------------------------------------------------------------------------------|---------------------------------------------------------------------------------------|---------------------------------------------------------------------------------------|---------------------------------------------------------------------------------------|
| <b>Al-Rashed 2002</b>      |    |    |    |    |    |    |    |
| <b>Begley 1997</b>         |    |    |    |    |    |    |    |
| <b>Bernsten 2001</b>       |    |    |    |    |    |    |    |
| <b>Bonetti 2018</b>        |    |    |    |    |    |    |    |
| <b>Bouvy 2003</b>          |    |    |    |    |    |    |    |
| <b>Clifford 2006</b>       |    |    |    |    |    |    |    |
| <b>Cooney 2015</b>         |   |   |   |   |   |   |   |
| <b>Eyler 2016</b>          |  |  |  |  |  |  |  |
| <b>Goodyer 1995</b>        |  |  |  |  |  |  |  |
| <b>Gwadry-Sridhar 2005</b> |  |  |  |  |  |  |  |
| <b>Hanlon 1996</b>         |  |  |  |  |  |  |  |
| <b>Hunt 2008</b>           |  |  |  |  |  |  |  |
| <b>Jung 2017</b>           |  |  |  |  |  |  |  |
| <b>Khdour 2009</b>         |  |  |  |  |  |  |  |
| <b>Lai 2011</b>            |  |  |  |  |  |  |  |

|                    | Random sequence generation | Allocation concealment | Blinding of participants and personnel | Blinding of outcome assessment | Incomplete outcome data | Selective outcome reporting | Other sources of bias |
|--------------------|----------------------------|------------------------|----------------------------------------|--------------------------------|-------------------------|-----------------------------|-----------------------|
| Lam 2017           |                            |                        |                                        |                                |                         |                             |                       |
| Lee 2006           |                            |                        |                                        |                                |                         |                             |                       |
| Lim 2004           |                            |                        |                                        |                                |                         |                             |                       |
| Lipton 1994        |                            |                        |                                        |                                |                         |                             |                       |
| López Cabezas 2006 |                            |                        |                                        |                                |                         |                             |                       |
| Lowe 1995          |                            |                        |                                        |                                |                         |                             |                       |
| Lowe 2000          |                            |                        |                                        |                                |                         |                             |                       |
| Lyons 2016         |                            |                        |                                        |                                |                         |                             |                       |
| Messerli 2016      |                            |                        |                                        |                                |                         |                             |                       |
| Naunton 2003       |                            |                        |                                        |                                |                         |                             |                       |
| Nazareth 2001      |                            |                        |                                        |                                |                         |                             |                       |
| Obreli-Neto 2011   |                            |                        |                                        |                                |                         |                             |                       |
| Olesen 2014        |                            |                        |                                        |                                |                         |                             |                       |
| Schulz 2019        |                            |                        |                                        |                                |                         |                             |                       |
| Shim 2018          |                            |                        |                                        |                                |                         |                             |                       |
| Solomon 1998       |                            |                        |                                        |                                |                         |                             |                       |

|                          | Random sequence generation | Allocation concealment | Blinding of participants and personnel | Blinding of outcome assessment | Incomplete outcome data | Selective outcome reporting | Other sources of bias |
|--------------------------|----------------------------|------------------------|----------------------------------------|--------------------------------|-------------------------|-----------------------------|-----------------------|
| <b>Stewart 2014</b>      |                            |                        |                                        |                                |                         |                             |                       |
| <b>Sturgess 2003</b>     |                            |                        |                                        |                                |                         |                             |                       |
| <b>Tommelein 2014</b>    |                            |                        |                                        |                                |                         |                             |                       |
| <b>Varma 1999</b>        |                            |                        |                                        |                                |                         |                             |                       |
| <b>Vivian 2002</b>       |                            |                        |                                        |                                |                         |                             |                       |
| <b>Willeboordse 2017</b> |                            |                        |                                        |                                |                         |                             |                       |
| <b>Willoch 2012</b>      |                            |                        |                                        |                                |                         |                             |                       |
| <b>Wu 2006</b>           |                            |                        |                                        |                                |                         |                             |                       |

**Key**

- Low risk of bias
- High risk of bias
- Unclear risk of bias

**Supplementary Table 5. Pharmacist Patient Care Services Intervention Reporting (PaCIR) Assessments**

|                            | Replicability | Patient population | Patient / other data sources | Environment | Delivery | Frequency and duration | Pharmacist role / responsibility | Attribution | Unique attributes |
|----------------------------|---------------|--------------------|------------------------------|-------------|----------|------------------------|----------------------------------|-------------|-------------------|
| <b>Al-Rashed 2002</b>      | ✓             | ✗                  | ✗                            | ✓           | ✓        | ✓                      | ✓                                | ✗           | N/A               |
| <b>Begley 1997</b>         | ✓             | ✗                  | ✓                            | ✓           | ✓        | ✗                      | ✓                                | ✗           | N/A               |
| <b>Bernsten 2001</b>       | ✓             | ✗                  | ✓                            | ✓           | ✓        | ✗                      | ✓                                | ✗           | N/A               |
| <b>Bonetti 2018</b>        | ✓             | ✗                  | ✓                            | ✓           | ✓        | ✗                      | ✓                                | ✗           | N/A               |
| <b>Bouvy 2003</b>          | ✗             | ✓                  | ✓                            | ✓           | ✓        | ✗                      | ✗                                | ✗           | N/A               |
| <b>Clifford 2006</b>       | ✗             | ✓                  | ✓                            | ✓           | ✓        | ✓                      | ✓                                | ✓           | N/A               |
| <b>Cooney 2015</b>         | ✓             | ✓                  | ✓                            | ✗           | ✓        | ✓                      | ✓                                | ✗           | N/A               |
| <b>Eyler 2016</b>          | ✓             | ✓                  | ✓                            | ✓           | ✓        | ✗                      | ✓                                | ✗           | N/A               |
| <b>Goodyer 1995</b>        | ✗             | ✓                  | ✓                            | ✓           | ✓        | ✗                      | ✗                                | ✗           | N/A               |
| <b>Gwadry-Sridhar 2005</b> | ✓             | ✓                  | ✓                            | ✓           | ✓        | ✓                      | ✗                                | ✗           | N/A               |
| <b>Hanlon 1996</b>         | ✓             | ✗                  | ✓                            | ✓           | ✓        | ✗                      | ✓                                | ✗           | N/A               |
| <b>Hunt 2008</b>           | ✓             | ✓                  | ✓                            | ✓           | ✓        | ✗                      | ✓                                | ✓           | N/A               |
| <b>Jung 2017</b>           | ✓             | ✓                  | ✓                            | ✓           | ✓        | ✗                      | ✓                                | ✗           | N/A               |
| <b>Khdour 2009</b>         | ✓             | ✗                  | ✓                            | ✓           | ✓        | ✓                      | ✓                                | ✗           | N/A               |
| <b>Lai 2011</b>            | ✓             | ✗                  | ✓                            | ✓           | ✗        | ✗                      | ✓                                | ✓           | N/A               |

|                    | Replicability | Patient population | Patient / other data sources | Environment | Delivery | Frequency and duration | Pharmacist role / responsibility | Attribution | Unique attributes |
|--------------------|---------------|--------------------|------------------------------|-------------|----------|------------------------|----------------------------------|-------------|-------------------|
| Lam 2017           | ✓             | ✗                  | ✓                            | ✓           | ✓        | ✗                      | ✓                                | ✓           | ✓                 |
| Lee 2006           | ✓             | ✓                  | ✓                            | ✓           | ✓        | ✓                      | ✓                                | ✓           | ✓                 |
| Lim 2004           | ✓             | ✗                  | ✓                            | ✓           | ✓        | ✗                      | ✓                                | ✗           | N/A               |
| Lipton 1994        | ✓             | ✗                  | ✓                            | ✓           | ✓        | ✓                      | ✓                                | ✗           | N/A               |
| López Cabezas 2006 | ✓             | ✓                  | ✗                            | ✓           | ✓        | ✓                      | ✓                                | ✓           | N/A               |
| Lowe 1995          | ✓             | ✗                  | ✓                            | ✓           | ✓        | ✗                      | ✓                                | ✓           | N/A               |
| Lowe 2000          | ✓             | ✗                  | ✓                            | ✓           | ✓        | ✗                      | ✓                                | ✓           | N/A               |
| Lyons 2016         | ✓             | ✓                  | ✓                            | ✓           | ✓        | ✓                      | ✓                                | ✓           | N/A               |
| Messerli 2016      | ✗             | ✗                  | ✓                            | ✓           | ✓        | ✗                      | ✓                                | ✓           | N/A               |
| Naunton 2003       | ✓             | ✓                  | ✓                            | ✓           | ✓        | ✓                      | ✓                                | ✗           | N/A               |
| Nazareth 2001      | ✓             | ✓                  | ✓                            | ✗           | ✓        | ✓                      | ✓                                | ✗           | N/A               |
| Obreli-Neto 2011   | ✓             | ✓                  | ✓                            | ✓           | ✓        | ✗                      | ✓                                | ✓           | N/A               |
| Olesen 2014        | ✓             | ✗                  | ✓                            | ✓           | ✓        | ✗                      | ✓                                | ✗           | N/A               |
| Schulz 2019        | ✓             | ✓                  | ✓                            | ✓           | ✓        | ✗                      | ✓                                | ✗           | N/A               |
| Shim 2018          | ✓             | ✗                  | ✓                            | ✓           | ✓        | ✗                      | ✓                                | ✗           | N/A               |
| Solomon 1998       | ✓             | ✓                  | ✓                            | ✓           | ✓        | ✓                      | ✓                                | ✓           | N/A               |

|                          | Replicability | Patient population | Patient / other data sources | Environment | Delivery | Frequency and duration | Pharmacist role / responsibility | Attribution | Unique attributes |
|--------------------------|---------------|--------------------|------------------------------|-------------|----------|------------------------|----------------------------------|-------------|-------------------|
| <b>Stewart 2014</b>      | ✓             | ✓                  | ✓                            | ✓           | ✓        | ✓                      | ✓                                | ✓           | N/A               |
| <b>Sturgess 2003</b>     | —             | —                  | —                            | ✓           | ✓        | —                      | —                                | —           | N/A               |
| <b>Tommelein 2014</b>    | ✓             | —                  | ✓                            | ✓           | ✓        | ✓                      | ✓                                | —           | N/A               |
| <b>Varma 1999</b>        | ✓             | —                  | ✓                            | ✓           | ✓        | —                      | ✓                                | —           | N/A               |
| <b>Vivian 2002</b>       | ✓             | —                  | ✓                            | ✓           | ✓        | —                      | ✓                                | ✓           | N/A               |
| <b>Willeboordse 2017</b> | ✓             | ✓                  | ✓                            | ✓           | ✓        | —                      | —                                | —           | N/A               |
| <b>Willoch 2012</b>      | ✓             | —                  | ✓                            | ✓           | ✓        | —                      | ✓                                | —           | N/A               |
| <b>Wu 2006</b>           | ✓             | —                  | ✓                            | ✓           | ✓        | ✓                      | ✓                                | ✓           | N/A               |

**Key**

 = Applicable, present  
 = Applicable, absent  
 N/A = Not applicable



## Supplementary Figure 1. Forest Plot of Blood Pressure Outcomes

### A. Systolic Blood Pressure

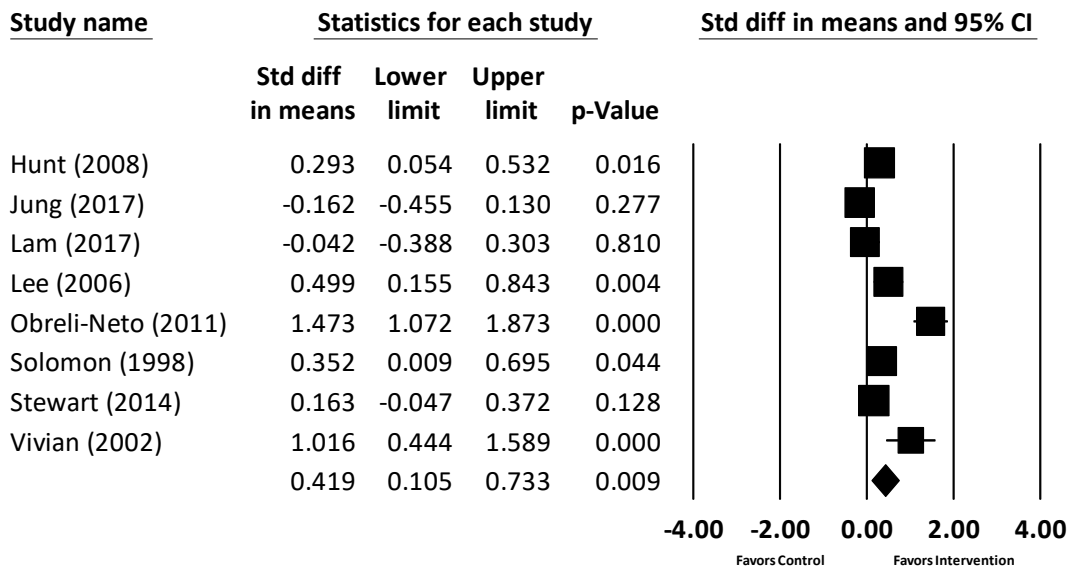

### B. Diastolic Blood Pressure

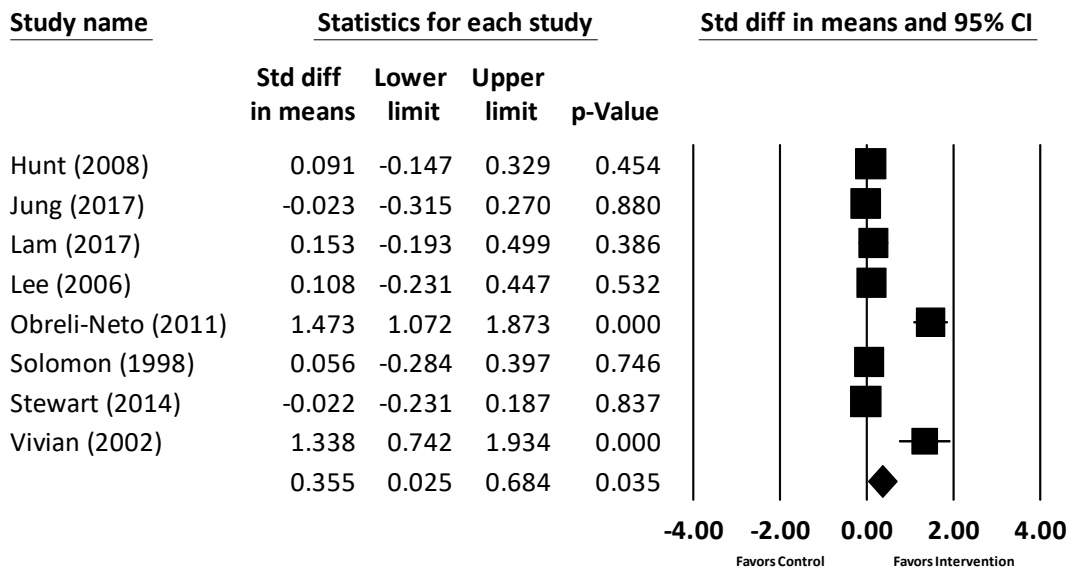

**Abbreviations:** CI: confidence interval; Std diff: standardized difference

## Supplementary Figure 2. Forest Plot of Mortality Outcomes

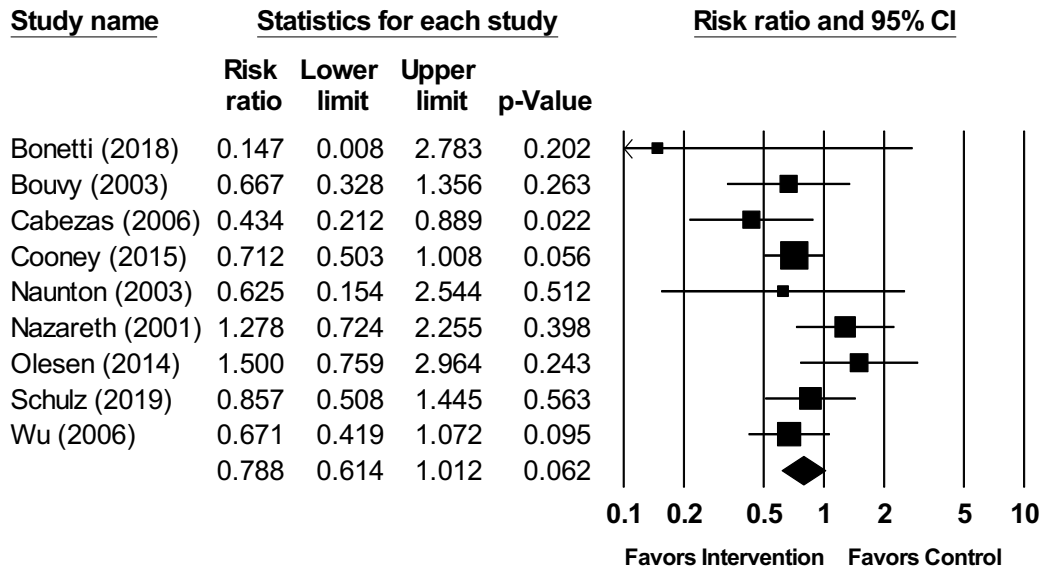

**Abbreviations:** CI: confidence interval

### Supplementary Figure 3. Forest Plot of Hospitalization/Readmission Outcomes

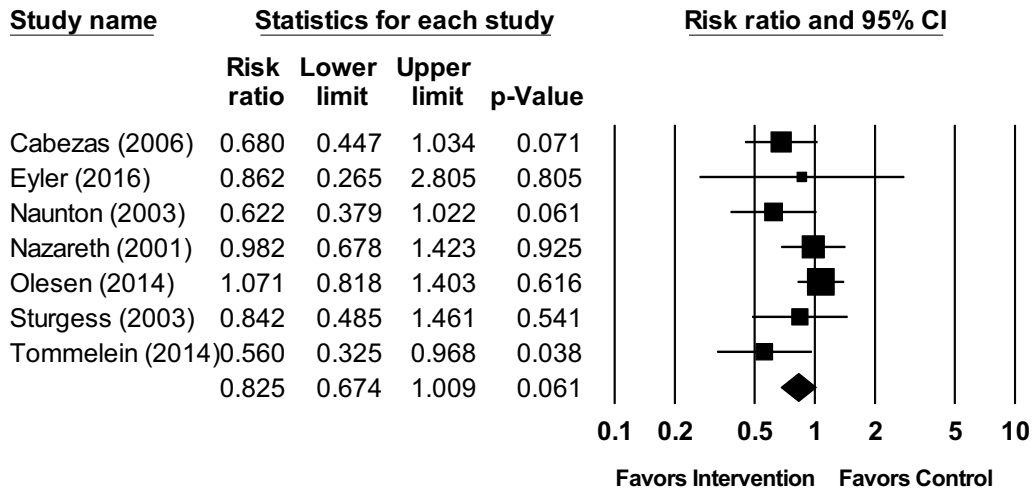

Abbreviations: CI: confidence interval

**Supplementary Figure 4. Funnel Plot**

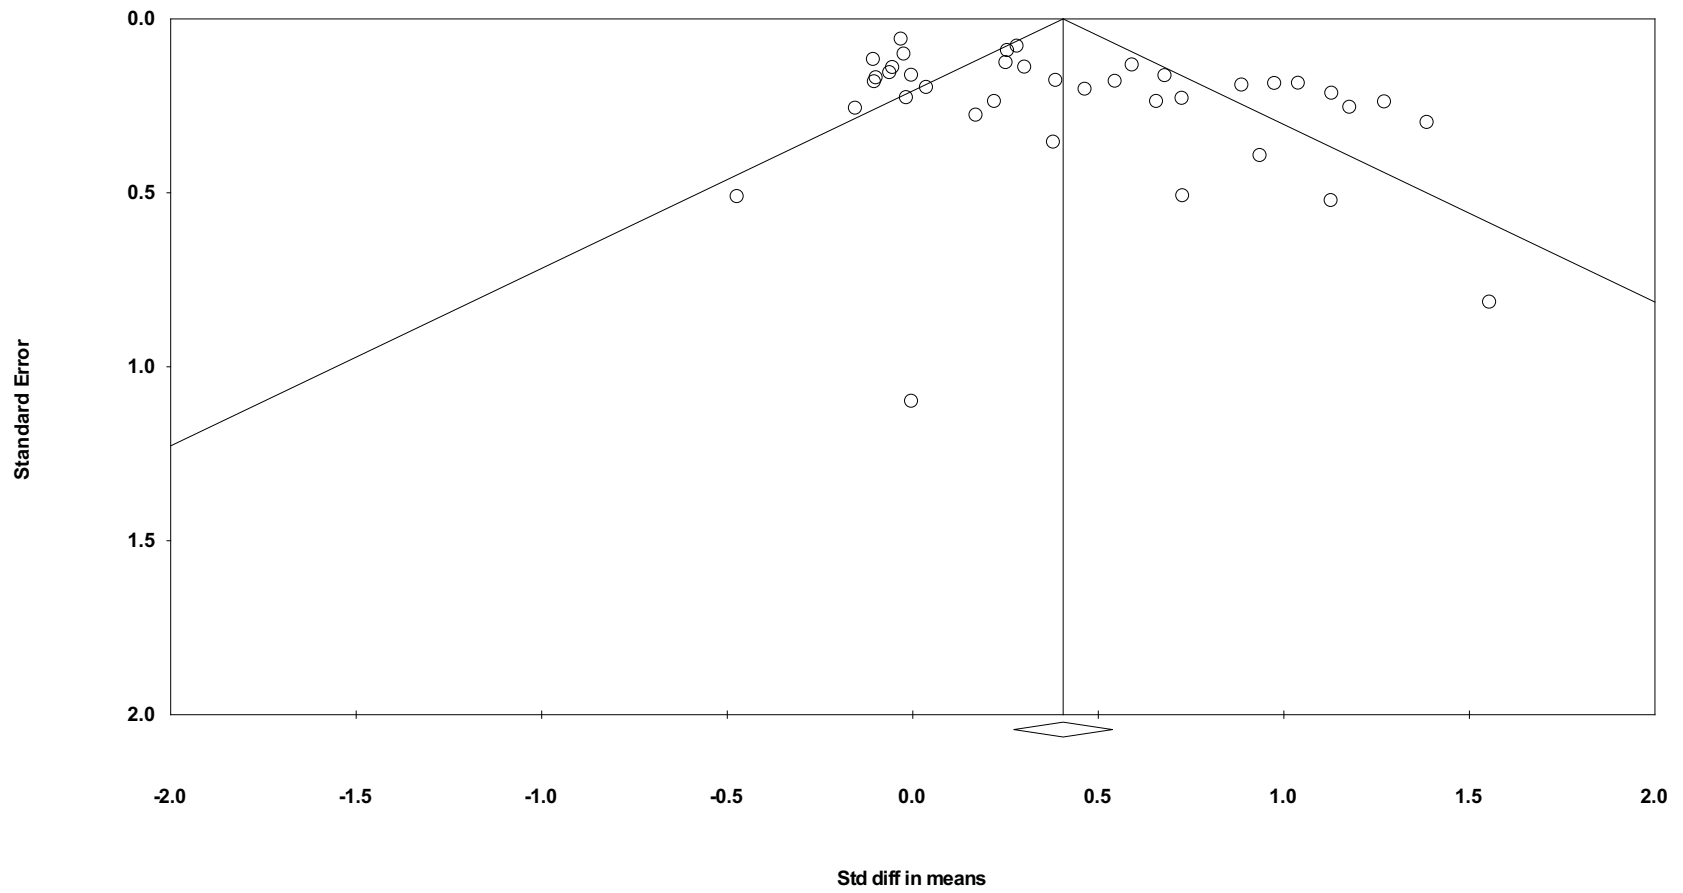

**Abbreviations:** Std diff: standardized difference
